# Supplementary material for: Transcriptome Analysis Reveals Multiple Hormones, Wounding and Sugar Signaling Pathways Mediate Adventitious Root Formation in Apple Rootstock
Source: MDPI journal article supplement (doi:10.3390/ijms19082201), 2018-07-27
Supplement: s1 [file s1]

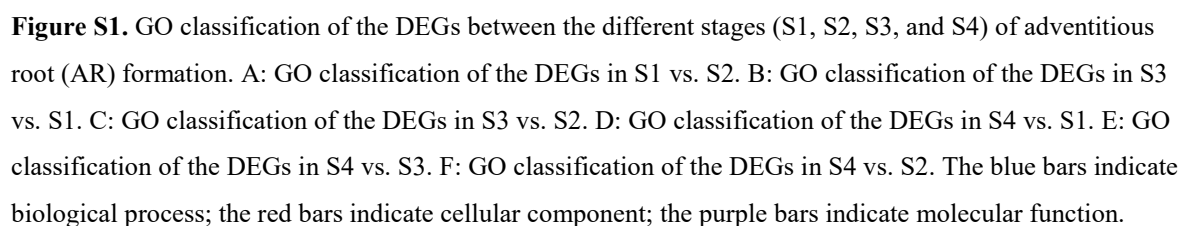

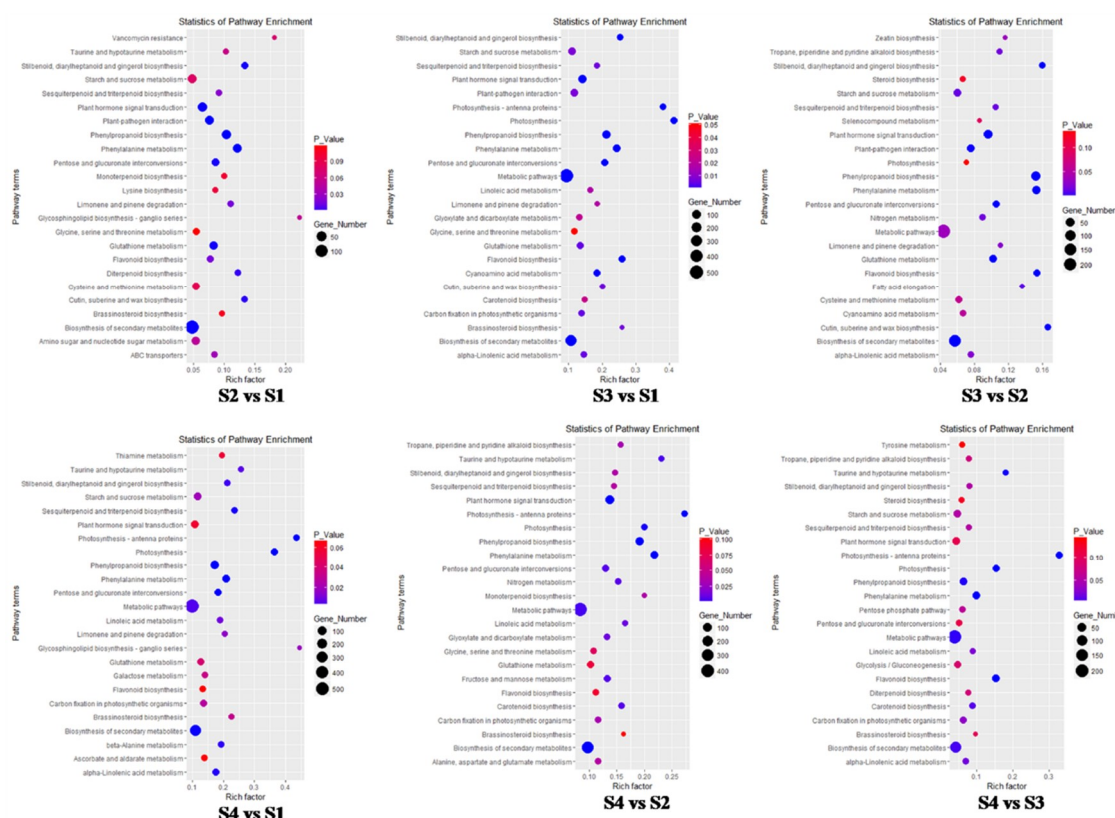

**Figure S2.** Differentially Expressed Genes (DEGs) KEGG Pathway Enrichment Analysis. The ordinate indicates the enriched pathway name, the abscissa represents ‘Rich factor’ (Sample number / Background number), ‘dot size’ indicates the relative number of DEGs in this pathway, while the color of the dots corresponds to a range of different P-values after correction.

**Table S1.** Sequence of primers used in the RT-qPCR analyses to validate gene expression.

| <b>Genes</b>      | <b>Gene ID</b> | <b>Forward (5' to 3')</b> | <b>Reverse (5' to 3')</b> |
|-------------------|----------------|---------------------------|---------------------------|
| <i>IPT1-2</i>     | MDP0000189484  | GAGCATACGAAGAGGCGGTGAG    | GCGTCCGTTGCGTCTAGTCT      |
| <i>IPT5</i>       | MDP0000220668  | GCGGATAGTGCGTCAGTTCCTT    | AGCGGTCACTGTCGGCATAGA     |
| <i>CRF4</i>       | MDP0000308379  | CGAGGTGGAGACTAACGGAACGA   | GAAGTGGAGGACGGAGGTTGGA    |
| <i>CKX7</i>       | MDP0000238100  | TGTCTCGAACTCGCTCGTCACT    | CCACCTGGAACTTCAACTGCTCAA  |
| <i>CKX</i>        | MDP0000223673  | TGCCACACCAGCCACTCCAA      | TGCTGCGTGATTGTTGTTGTTGAA  |
| <i>GATA1</i>      | MDP0000190038  | AGATGAGGATGATGCGGAAGATGT  | CTCCTAATTGCGATGATGGATGCT  |
| <i>GATA5</i>      | MDP0000172464  | TCACCATCATCATCGCCTTGTCT   | GCAATGACTACCTCCGCTGAA     |
| <i>ARF11</i>      | MDP0000268306  | ACCAGCAGCAGCAGCAATTAGTT   | TGGCATAGCGATGTGACGACTTG   |
| <i>ARF9</i>       | MDP0000634433  | GTCCACAGAACAAATGGGCAGTTG  | CATCTTCTGTACCTCGTCGCTTGA  |
| <i>ARF1</i>       | MDP0000564492  | ATTGCTGCTCATACTCCTCCTCCT  | GTGCTGCTGCTGCTGACCTT      |
| <i>IAA29</i>      | MDP0000543718  | CAGCAGCAGCAGCGAATAATTCC   | CAAGGTGTCTCTGAGCGACTGAA   |
| <i>IAA19</i>      | MDP0000296324  | GGCATCGCGAGGTGTTGAA       | CCACTAGCATCCAGTCTCCATCTT  |
| <i>PIN1</i>       | MDP0000138035  | TGATGCCTCCAACAAGTGTGATGA  | GAACGTGCCACCTGAATGAGACTA  |
| <i>AXR3/IAA17</i> | MDP0000253285  | CGGACTGAACTACGACGAGACCAA  | TCACAACATTCCACCCTTGCTCCT  |
| <i>IAA3/SHY2</i>  | MDP0000303142  | AGCATGGATGGAGCACCTTACCT   | ATCCTTTGTAGCCCTCCCTCTCTG  |
| <i>PLT2</i>       | MDP0000871080  | ATCCGCCACTACTACTGCTCCTAA  | AGTTGGTGCTATCCGATGAGTTCA  |
| <i>BR6OX2</i>     | MDP0000286141  | GACTCTGCCTGCCGATGCTT      | GGTTCTTGATGTGTTGCTCCAGTG  |
| <i>JAZ12</i>      | MDP0000901967  | TACCAAGCCACCAACTCCTGTCA   | CAGCACGTCATGCAAGCTCTCA    |
| <i>JAZ26</i>      | MDP0000565690  | AACCATGAACTTGCTGACGACCAT  | TCCAGGCTGCTGATCTCCCAAA    |
| <i>GA2OX4</i>     | MDP0000161181  | ACTCAGTTGTGAAGCCAAGGATGT  | CGGCGACACCATCTCTGGAAGA    |
| <i>GA2OX2</i>     | MDP0000145827  | ACATCCTCCTCAGCACCAATCTTG  | ATCAGCCACCATTTCAGCACTT    |
| <i>GH3.1</i>      | MDP0000121609  | AGACGACCAGGAACACGGACTC    | TTGAGGTATTCGGTCTCGGCGTTA  |
| <i>PAT1</i>       | MDP0000152670  | TGGCACAATGGATGAAGGATGAGT  | AGTTCGGACCTCGCTGGTTCTT    |
| <i>SAMS3</i>      | MDP0000302980  | TCTGTTACCGTCACTATCTCACC   | GCACCACTCCTGTCCACCTT      |
| <i>ACO1</i>       | MDP0000200896  | TCCACCATCCAAGAACAACACCAT  | GCATCGCCAGCAGGATTGTAGAA   |
| <i>EFE1</i>       | MDP0000251295  | TGGACACAGTGGAGAGGCTGAC    | ACTTCTGTCTGAACGGCATCAAGG  |
| <i>EFE2</i>       | MDP0000200737  | CGCTGGTGGTATCATCTGCTT     | CATTCTGGTTCCGTCGCACTGAG   |
| <i>ERF1</i>       | MDP0000235313  | AAGGATGTTGCCGGTGATGG      | CGCTGGTACTTGATTCTCGGTTG   |
| <i>LRP1</i>       | MDP0000171430  | TCTCCTCTCCTCCTCCGACCAT    | AATGACACCGACGCCGACAC      |
| <i>SHI</i>        | MDP0000147890  | ACCAACACCACCAACAGCAAGAT   | TGCGATGTTACAGCCGTCTG      |
| <i>SCR1</i>       | MDP0000203826  | TCCTTATGCGGTGACTCTGTCCAA  | ACTCTTCTTCACTCGTCGGTTCCT  |
| <i>SCL5</i>       | MDP0000284679  | ATCCTCGGGAACCAAGTGCCTAC   | GTTGACAGGAGAGCCACCAGACT   |
| <i>RHS19</i>      | MDP0000488361  | CCACCACCACCTTCATCATCATCA  | CAGCCTCAGTGAGTCCACAGTTC   |
| <i>MDH</i>        | MDP0000277049  | GAGATGCTGGCGTTGTTGAATGC   | CCTTCTGGATGCTTGCTGCTAACT  |
| <i>FLS1</i>       | MDP0000294667  | CGAGCAAGCCAACTCTGAACGA    | AAGACGCCACTGATGGATCTACTG  |
| <i>CYCD1;1</i>    | MDP0000809276  | GCCTGATGATACCACCACCACCTC  | GCGGAACCTGGAGATGTAGGATGG  |
| <i>CYCD3;1</i>    | MDP0000286130  | GCGGTGGATTGGATGCTGAGAG    | GAAGTTGGAGGCTGGACAAGAACC  |
| <i>CYCP4;1</i>    | MDP0000139550  | CCGTCTTGCTTAATTGTTGCGTAC  | GCAGCCACCATGACACTCGTA     |
| <i>Wd-Id-4</i>    | MDP0000836784  | GTGGCAGCAAGTATTGGAGCAGTT  | GCAGAAGACGAAGAGTCGGAGAGT  |
| <i>Wd-Id-8</i>    | MDP0000228919  | TCTCTGGCGGCGAAGCATCA      | TGGAGGGACTCGTCAGTTTGTT    |
| <i>WRKY</i>       | MDP0000602139  | GAAGCAAGTGGAGCGGAACAGAT   | CGAGCGAGTTGCGGTGAGTT      |
| <i>SUS4-3</i>     | MDP0000250070  | AGGACAATGAGGAGAAGGCTGAGA  | ACCATTCTTGACACGGTTCATCTG  |
| <i>SPS4F</i>      | MDP0000288684  | ATGCCTGTATGGTCCGATGATGTT  | CGAGAGCACGAGCAAGTTCCA     |
| <i>WINV4</i>      | MDP0000275150  | TGCGTTCCGAGACCCGACAA      | GGAGCAGAGTGAGAGGATGATGG   |

|               |               |                           |                          |
|---------------|---------------|---------------------------|--------------------------|
| <i>HXK2</i>   | MDP0000181206 | GCGGTTGAGCAAGATGTTGTAGG   | CATAAGCAGCGTTCGTTCCAGTG  |
| <i>PMT5</i>   | MDP0000688348 | AGTCACCTCGTTGGCTCGTCAT    | ACCGTGGCTGCGTTTAGATACCT  |
| <i>C/VIF1</i> | MDP0000305934 | TACTCATTGCACCGCCAACAACC   | AGGAGAGCGTCGGATGCTATCAG  |
| <i>ACTIN</i>  |               | TGACCGAATGAGCAAGGAAATTACT | TACTCAGCTTTGGCAATCCACATC |

**Table S2.** Summary of the sequencing statistics obtained for each of the samples subjected to RNA-seq using an Illumina platform.

|                                     | S1 1              | S1 2              | S1 3              |
|-------------------------------------|-------------------|-------------------|-------------------|
| total reads                         | 29086044          | 23838464          | 18063618          |
| aligned concordantly 0 times        | 11493957 (39.52%) | 10438558 (43.79%) | 8048133 (44.55%)  |
| aligned concordantly exactly 1 time | 13172963 (45.29%) | 9805199 (41.13%)  | 7341406 (40.64%)  |
| aligned concordantly >1 times       | 4419124 (15.19%)  | 3594707 (15.08%)  | 2674079 (14.80%)  |
| overall alignment rate              | 65.69%            | 62.37%            | 61.60%            |
|                                     | S2 1              | S2 2              | S2 3              |
| total reads                         | 32705777          | 22902663          | 24102594          |
| aligned concordantly 0 times        | 12139092 (37.12%) | 10458893 (45.67%) | 10559313 (43.81%) |
| aligned concordantly exactly 1 time | 15366115 (46.98%) | 9056595 (39.54%)  | 9866985 (40.94%)  |
| aligned concordantly >1 times       | 5200570 (15.90%)  | 3387175 (14.79%)  | 3676296 (15.25%)  |
| overall alignment rate              | 68.44%            | 60.72%            | 62.29%            |
|                                     | S3 1              | S3 2              | S3 3              |
| total reads                         | 35263599          | 26986857          | 29754876          |
| aligned concordantly 0 times        | 13005583 (36.88%) | 11360125 (42.10%) | 12612850 (42.39%) |
| aligned concordantly exactly 1 time | 16490294 (46.76%) | 11412094 (42.29%) | 12526298 (42.10%) |
| aligned concordantly >1 times       | 5767722 (16.36%)  | 4214638 (15.62%)  | 4615728 (15.51%)  |
| overall alignment rate              | 68.32%            | 63.72%            | 63.20%            |
|                                     | S4 1              | S4 2              | S4 3              |
| total reads                         | 27156578          | 26008927          | 28352841          |
| aligned concordantly 0 times        | 10227320 (37.66%) | 11307666 (43.48%) | 12053023 (42.51%) |
| aligned concordantly exactly 1 time | 12465020 (45.90%) | 10638407 (40.90%) | 11758334 (41.47%) |
| aligned concordantly >1 times       | 4464238 (16.44%)  | 4062854 (15.62%)  | 4541484 (16.02%)  |
| overall alignment rate              | 67.81%            | 62.75%            | 63.38%            |

**Table S3.** Summary of the sequencing statistics for the clean reads obtained in each sample.

| Filename | Total Sequences | Sequence length | %GC | Total<br>Percentage | Q20(%)      | Q30(%)      |
|----------|-----------------|-----------------|-----|---------------------|-------------|-------------|
| S1_1     | 29086044        | 114-126         | 47  | 50.71156097         | 99.340756   | 93.58549069 |
| S1_1     | 29086044        | 114-126         | 47  | 50.71424921         | 98.92312616 | 91.36095304 |
| S2_1     | 32705777        | 114-126         | 47  | 48.79971331         | 99.34858909 | 93.53149139 |
| S2_1     | 32705777        | 114-126         | 47  | 48.21483689         | 98.82456852 | 90.74312774 |
| S3_1     | 35263599        | 114-126         | 48  | 44.98571313         | 99.29397167 | 93.12435183 |
| S3_1     | 35263599        | 114-126         | 48  | 46.8170726          | 98.84582399 | 90.71421496 |
| S4_1     | 27156578        | 114-126         | 48  | 49.47068727         | 99.2784842  | 92.95830277 |
| S4_1     | 27156578        | 114-126         | 48  | 49.22643361         | 98.81154393 | 90.44684496 |
| S1_2     | 23838464        | 114-126         | 47  | 55.94454853         | 98.89387588 | 90.32083191 |
| S1_2     | 23838464        | 114-126         | 47  | 57.82722839         | 97.90658492 | 85.84029995 |
| S2_2     | 22902663        | 114-126         | 48  | 52.48166846         | 98.77958297 | 89.90841371 |
| S2_2     | 22902663        | 114-126         | 48  | 54.35704044         | 97.87359662 | 86.07480711 |
| S3_2     | 26986857        | 114-126         | 47  | 55.75719092         | 98.88379369 | 90.4081346  |
| S3_2     | 26986857        | 114-126         | 47  | 57.69937997         | 97.77695861 | 85.45134396 |
| S4_2     | 26008927        | 114-126         | 47  | 52.70288728         | 98.70210332 | 89.72893422 |
| S4_2     | 26008927        | 114-126         | 47  | 53.80187346         | 97.82119808 | 85.95887866 |
| S1_3     | 18063618        | 114-126         | 47  | 58.9415796          | 98.90929934 | 90.45063951 |
| S1_3     | 18063618        | 114-126         | 47  | 60.57150036         | 97.81503351 | 85.50723338 |
| S2_3     | 24102594        | 114-126         | 47  | 54.25026432         | 98.84219516 | 90.28373461 |
| S2_3     | 24102594        | 114-126         | 47  | 56.43160791         | 97.81534718 | 85.7757136  |
| S3_3     | 29754876        | 114-126         | 47  | 52.38728383         | 98.80175269 | 90.00838048 |
| S3_3     | 29754876        | 114-126         | 47  | 53.65553914         | 98.03292408 | 86.67356906 |
| S4_3     | 28352841        | 114-126         | 48  | 51.46086439         | 98.92881281 | 90.42226492 |
| S4_3     | 28352841        | 114-126         | 48  | 53.09013645         | 97.76057715 | 85.21974923 |

**Table S4.** Selection of auxin-related genes from among the DEGs identified by RNA-seq analysis of stem cuttings of ‘T337’ apple rootstocks during AR formation. The colors in every other column indicate different gene expression levels.

| Apple genes        | Arabidopsis |                                                             | S1    |        | S2    |        | S3     |        | S4     |        |
|--------------------|-------------|-------------------------------------------------------------|-------|--------|-------|--------|--------|--------|--------|--------|
| Identification     | Homolog     | Annotation                                                  | Log2  |        | Log2  |        | Log2   |        | Log2   |        |
|                    |             |                                                             | FPKM  | (FPKM) | FPKM  | (FPKM) | FPKM   | (FPKM) | FPKM   | (FPKM) |
| <b>IAA related</b> |             |                                                             |       |        |       |        |        |        |        |        |
| MDP0000634433      | AT4G23980.1 | auxin response factor 9 (ARF9)                              | 2.77  | 1.47   | 2.15  | 1.11   | 9.84   | 3.30   | 9.60   | 3.26   |
| MDP0000564492      | AT1G59750.1 | auxin response factor 1 (ARF1)                              | 0.13  | -2.98  | 1.04  | 0.06   | 1.32   | 0.40   | 1.47   | 0.55   |
| MDP0000268306      | AT1G19220.1 | auxin response factor 19 (ARF11)                            | 34.53 | 5.11   | 30.20 | 4.92   | 19.16  | 4.26   | 14.68  | 3.88   |
| MDP0000232116      | AT1G77850.1 | auxin response factor 17 (ARF17)                            | 0.75  | -0.41  | 1.77  | 0.82   | 3.73   | 1.90   | 3.04   | 1.61   |
| MDP0000497581      | AT1G70940.1 | Auxin efflux carrier family protein (PIN3)                  | 0.00  | -14.01 | 0.00  | -13.63 | 0.27   | -1.90  | 0.01   | -7.63  |
| MDP0000138035      | AT1G73590.1 | Auxin efflux carrier family protein (PIN1)                  | 32.61 | 5.03   | 22.86 | 4.51   | 20.35  | 4.35   | 10.07  | 3.33   |
| MDP0000259421      | AT1G15520.1 | pleiotropic drug resistance 12 (PDR12)                      | 5.09  | 2.35   | 4.58  | 2.19   | 2.85   | 1.51   | 2.05   | 1.03   |
| MDP0000257483      | AT2G26910.1 | pleiotropic drug resistance 4 (PDR4)                        | 1.38  | 0.47   | 0.42  | -1.25  | 0.15   | -2.76  | 0.00   | -0.49  |
| MDP0000253285      | AT1G04250.1 | AUX/IAA transcriptional regulator family protein (IAA17)    | 11.86 | 3.57   | 20.06 | 4.33   | 23.32  | 4.54   | 33.16  | 5.05   |
| MDP0000324398      | AT5G43700.1 | AUX/IAA transcriptional regulator family protein (IAA4)     | 1.81  | 0.86   | 9.41  | 3.23   | 5.04   | 2.33   | 1.18   | 0.24   |
| MDP0000876321      | AT1G19220.1 | auxin response factor 19 (ARF19)                            | 4.40  | 2.14   | 5.34  | 2.42   | 4.64   | 2.21   | 4.30   | 2.10   |
| MDP0000303142      | AT1G04240.1 | AUX/IAA transcriptional regulator family protein(IAA3/SHY2) | 13.48 | 3.75   | 16.93 | 4.08   | 23.04  | 4.53   | 15.22  | 3.93   |
| MDP0000543718      | AT4G32280.1 | indole-3-acetic acid inducible 29 (IAA29)                   | 5.88  | 2.56   | 6.20  | 2.63   | 0.47   | -1.10  | 0.17   | -2.52  |
| MDP0000295589      | AT1G04240.1 | AUX/IAA transcriptional regulator family protein(IAA3/SHY2) | 1.81  | 0.85   | 2.11  | 1.08   | 1.86   | 0.90   | 0.28   | -1.83  |
| MDP0000226842      | AT1G28130.1 | Auxin-responsive GH3 family protein (GH3.17)                | 0.04  | -4.51  | 0.17  | -2.60  | 2.05   | 1.03   | 0.57   | -0.82  |
| MDP0000121609      | AT2G14960.1 | Auxin-responsive GH3 family protein (GH3.1)                 | 0.09  | -3.42  | 28.41 | 4.83   | 17.78  | 4.15   | 10.80  | 3.43   |
| MDP0000132162      | AT5G54510.1 | Auxin-responsive GH3 family protein (GH3.6)                 | 3.58  | 1.84   | 7.74  | 2.95   | 14.01  | 3.81   | 13.55  | 3.76   |
| MDP0000204381      | AT2G47750.1 | putative indole-3-acetic acid-amido synthetase GH3.9(GH3.9) | 0.64  | -0.65  | 0.11  | -3.20  | 0.33   | -1.61  | 0.35   | -1.53  |
| MDP0000226842      | AT1G28130.1 | Auxin-responsive GH3 family protein (GH3.17)                | 0.04  | -4.51  | 0.17  | -2.60  | 2.05   | 1.03   | 0.57   | -0.82  |
| MDP0000568498      | AT2G47750.1 | putative indole-3-acetic acid-amido synthetase GH3.9(GH3.9) | 5.38  | 2.43   | 0.39  | -1.37  | 1.75   | 0.81   | 1.16   | 0.22   |
| MDP0000612660      | AT2G14960.1 | Auxin-responsive GH3 family protein (GH3.1)                 | 1.29  | 0.37   | 45.42 | 5.51   | 29.51  | 4.88   | 16.13  | 4.01   |
| MDP0000811081      | AT4G03400.1 | Auxin-responsive GH3 family protein (GH3.10)                | 1.57  | 0.65   | 0.34  | -1.56  | 0.09   | -3.44  | 0.10   | -3.34  |
| MDP0000204381      | AT2G47750.1 | putative indole-3-acetic acid-amido synthetase GH3.9(GH3.9) | 0.64  | -0.65  | 0.11  | -3.20  | 0.33   | -1.61  | 0.35   | -1.53  |
| MDP0000333431      | AT3G16500.1 | phytochrome-associated protein 1 (PAP1)                     | 2.24  | 1.17   | 5.32  | 2.41   | 7.07   | 2.82   | 8.09   | 3.02   |
| MDP0000296324      | AT3G15540.1 | indole-3-acetic acid inducible 19 (IAA19,MSG2)              | 3.94  | 1.98   | 16.73 | 4.06   | 4.94   | 2.31   | 3.73   | 1.90   |
| MDP0000237499      | AT3G23050.1 | indole-3-acetic acid 7 (IAA3)                               | 0.24  | -2.09  | 15.39 | 3.94   | 14.33  | 3.84   | 15.32  | 3.94   |
| MDP0000195460      | AT4G32280.1 | indole-3-acetic acid inducible 29 (IAA29)                   | 4.58  | 2.19   | 14.43 | 3.85   | 7.74   | 2.95   | 1.19   | 0.26   |
| MDP0000367919      | AT2G46690.1 | SAUR-like auxin-responsive protein family                   | 39.78 | 5.31   | 62.91 | 5.98   | 86.44  | 6.43   | 83.79  | 6.39   |
| MDP0000315517      | AT2G37030.1 | SAUR-like auxin-responsive protein family                   | 0.10  | -3.32  | 0.15  | -2.70  | 0.76   | -0.39  | 14.03  | 3.81   |
| MDP0000288641      | AT1G75590.1 | SAUR-like auxin-responsive protein family                   | 0.22  | -2.20  | 0.51  | -0.96  | 1.61   | 0.69   | 2.63   | 1.39   |
| MDP0000286931      | AT5G50760.1 | SAUR-like auxin-responsive protein family                   | 8.78  | 3.13   | 22.10 | 4.47   | 185.30 | 7.53   | 232.49 | 7.86   |
| MDP0000183569      | AT3G12830.1 | SAUR-like auxin-responsive protein family                   | 0.37  | -1.42  | 0.10  | -3.27  | 0.28   | -1.85  | 3.58   | 1.84   |

|                       |             |                                                       |       |       |       |       |       |       |        |       |
|-----------------------|-------------|-------------------------------------------------------|-------|-------|-------|-------|-------|-------|--------|-------|
| MDP0000153382         | AT2G24400.1 | SAUR-like auxin-responsive protein family             | 3.54  | 1.82  | 30.92 | 4.95  | 38.40 | 5.26  | 47.77  | 5.58  |
| MDP0000141719         | AT1G75580.1 | SAUR-like auxin-responsive protein family             | 4.53  | 2.18  | 21.55 | 4.43  | 16.99 | 4.09  | 17.81  | 4.15  |
| MDP0000596615         | AT1G72430.1 | SAUR-like auxin-responsive protein family             | 61.59 | 5.94  | 30.93 | 4.95  | 37.77 | 5.24  | 152.98 | 7.26  |
| MDP0000912039         | AT2G21220.1 | SAUR-like auxin-responsive protein family             | 9.36  | 3.23  | 13.02 | 3.70  | 5.79  | 2.53  | 2.40   | 1.26  |
| MDP0000874044         | AT2G24400.1 | SAUR-like auxin-responsive protein family             | 0.06  | -4.07 | 1.40  | 0.49  | 21.67 | 4.44  | 8.30   | 3.05  |
| MDP0000848515         | AT3G12830.1 | SAUR-like auxin-responsive protein family             | 26.44 | 4.72  | 18.02 | 4.17  | 26.20 | 4.71  | 51.93  | 5.70  |
| MDP0000828073         | AT2G36210.1 | SAUR-like auxin-responsive protein family             | 3.49  | 1.80  | 0.56  | -0.84 | 0.46  | -1.11 | 0.10   | -3.32 |
| MDP0000654738         | AT4G34800.1 | SAUR-like auxin-responsive protein family             | 42.24 | 5.40  | 34.41 | 5.10  | 17.17 | 4.10  | 13.46  | 3.75  |
| MDP0000810244         | AT5G50760.1 | SAUR-like auxin-responsive protein family             | 26.26 | 4.71  | 20.48 | 4.36  | 53.93 | 5.75  | 74.52  | 6.22  |
| MDP0000786165         | AT2G46690.1 | SAUR-like auxin-responsive protein family             | 16.52 | 4.05  | 14.44 | 3.85  | 57.61 | 5.85  | 44.22  | 5.47  |
| MDP0000313042         | AT5G55090.1 | mitogen-activated protein kinase15 (MAPKKK15)         | 4.66  | 2.22  | 4.83  | 2.27  | 2.97  | 1.57  | 0.54   | -0.89 |
| MDP0000217310         | AT2G30040.1 | mitogen-activated protein kinase 14 (MAPKKK14)        | 2.91  | 1.54  | 1.58  | 0.66  | 3.95  | 1.98  | 4.01   | 2.00  |
| MDP0000187103         | AT5G67080.1 | mitogen-activated protein kinase 19 (MAPKKK19)        | 10.06 | 3.33  | 3.47  | 1.80  | 10.31 | 3.37  | 16.30  | 4.03  |
| MDP0000193927         | AT5G55090.1 | mitogen-activated protein kinase15 (MAPKKK15)         | 1.11  | 0.15  | 0.80  | -0.33 | 3.72  | 1.90  | 4.74   | 2.24  |
| MDP0000431417         | AT1G07150.1 | mitogen-activated protein kinase 13 (MAPKKK13)        | 1.76  | 0.82  | 0.49  | -1.02 | 0.67  | -0.59 | 0.54   | -0.90 |
| MDP0000835932         | AT5G67080.1 | mitogen-activated protein kinase 19 (MAPKKK19)        | 16.46 | 4.04  | 14.79 | 3.89  | 15.19 | 3.92  | 6.76   | 2.76  |
| MDP0000203826         | AT3G54220.1 | GRAS family transcription factor (SCR,SGR1)           | 0.56  | -0.84 | 3.41  | 1.77  | 4.93  | 2.30  | 3.81   | 1.93  |
| MDP0000256486         | AT5G66770.1 | GRAS family transcription factor (AT5G66770)          | 9.96  | 3.32  | 10.17 | 3.35  | 12.48 | 3.64  | 8.80   | 3.14  |
| MDP0000287040         | AT2G29060.1 | GRAS family transcription factor (AT2G29060)          | 3.80  | 1.92  | 4.71  | 2.23  | 2.47  | 1.30  | 1.78   | 0.84  |
| MDP0000152670         | AT5G48150.1 | GRAS family transcription factor (PAT1)               | 9.76  | 3.29  | 12.95 | 3.70  | 5.14  | 2.36  | 3.72   | 1.89  |
| MDP0000308434         | AT3G13840.1 | GRAS family transcription factor (AT3G13840)          | 4.24  | 2.08  | 8.26  | 3.05  | 11.27 | 3.49  | 17.68  | 4.14  |
| MDP0000397638         | AT3G54220.1 | GRAS family transcription factor (SCR,SGR1)           | 3.69  | 1.88  | 2.51  | 1.33  | 7.98  | 3.00  | 6.51   | 2.70  |
| MDP0000190889         | AT4G37750.1 | Integrase-type DNA-binding superfamily                | 3.04  | 1.61  | 6.22  | 2.64  | 2.26  | 1.18  | 1.93   | 0.95  |
| Protein (ANT,CKC.DRG) |             |                                                       |       |       |       |       |       |       |        |       |
| MDP0000871080         | AT1G51190.1 | Integrase-type DNA-binding superfamily protein (PLT2) | 0.05  | -4.19 | 0.05  | -4.38 | 1.49  | 0.58  | 1.93   | 0.95  |
| MDP0000894037         | AT2G28380.1 | dsRNA-binding protein 2 (DRB2)                        | 13.77 | 3.78  | 18.73 | 4.23  | 11.58 | 3.53  | 11.82  | 3.56  |
| MDP0000284679         | AT1G50600.1 | scarecrow-like 5 (SCL5)                               | 9.79  | 3.29  | 7.88  | 2.98  | 5.33  | 2.41  | 2.80   | 1.48  |
| MDP0000885425         | AT2G21050.1 | like AUXIN RESISTANT 2 (LAX2)                         | 7.54  | 2.91  | 3.18  | 1.67  | 3.11  | 1.64  | 2.55   | 1.35  |
| MDP0000893203         | AT1G72770.1 | homology to ABI1 (HAB1)                               | 0.72  | -0.47 | 1.76  | 0.82  | 2.96  | 1.57  | 4.10   | 2.04  |
| MDP0000195666         | AT1G33410.1 | SUPPRESSOR OF AUXIN RESISTANCE1 (SAR1)                | 1.18  | 0.24  | 0.35  | -1.50 | 0.59  | -0.77 | 0.58   | -0.78 |

**Table S5.** Selection of root development- and cell-cycle-related genes from among the DEGs identified by RNA-seq analysis of stem cuttings of ‘T337’ apple root stocks during AR formation. The colors in every other column indicate different gene expression levels.

| Apple genes                                  | Arabidopsis |                                                                   | S1     |        | S2     |        | S3     |        | S4     |        |
|----------------------------------------------|-------------|-------------------------------------------------------------------|--------|--------|--------|--------|--------|--------|--------|--------|
| Identification                               | Homolog     | Annotation                                                        | Log2   |        | Log2   |        | Log2   |        | Log2   |        |
|                                              |             |                                                                   | FPKM   | (FPKM) | FPKM   | (FPKM) | FPKM   | (FPKM) | FPKM   | (FPKM) |
| <b>Cell cycle related</b>                    |             |                                                                   |        |        |        |        |        |        |        |        |
| MDP0000809276                                | AT1G70210.1 | CYCLIN D1;1 (CYCD1;1)                                             | 0.91   | -0.14  | 2.72   | 1.44   | 7.16   | 2.84   | 11.62  | 3.54   |
| MDP0000304147                                | AT1G20610.1 | Cyclin B2;3 (CYCB2;3)                                             | 1.55   | 0.63   | 4.47   | 2.16   | 5.00   | 2.32   | 2.33   | 1.22   |
| MDP0000286130                                | AT4G34160.1 | CYCLIN D3;1 (CYCD3;1)                                             | 26.66  | 4.74   | 41.48  | 5.37   | 50.14  | 5.65   | 45.13  | 5.50   |
| MDP0000139550                                | AT2G44740.1 | cyclin p4;1 (CYCP4;1)                                             | 0.96   | -0.05  | 0.35   | -1.51  | 1.94   | 0.96   | 4.62   | 2.21   |
| MDP0000135761                                | AT5G45190.1 | Cyclin family protein (AT5G45190)(CYCP4;2)                        | 3.56   | 1.83   | 4.63   | 2.21   | 3.52   | 1.82   | 2.59   | 1.37   |
| MDP0000869524                                | AT3G05330.1 | cyclin family (ATN)                                               | 0.85   | -0.23  | 2.64   | 1.40   | 2.48   | 1.31   | 1.31   | 0.39   |
| MDP0000275150                                | AT2G36190.1 | cell wall invertase 4 (CWINV4)                                    | 7.87   | 2.98   | 3.38   | 1.75   | 1.62   | 0.70   | 1.22   | 0.29   |
| MDP0000276729                                | AT1G18040.1 | cyclin-dependent kinase D1;3 (CDKD1;3)                            | 4.42   | 2.14   | 4.14   | 2.05   | 3.32   | 1.73   | 2.99   | 1.58   |
| MDP0000304147                                | AT1G20610.1 | Cyclin B2;3 (CYCB2;3)                                             | 1.55   | 0.63   | 4.47   | 2.16   | 5.00   | 2.32   | 2.33   | 1.22   |
| MDP0000196672                                | AT1G21270.1 | wall-associated kinase 2 (WAK2)                                   | 0.32   | -1.62  | 0.03   | -5.31  | 0.26   | -1.95  | 0.00   | -15.68 |
| MDP0000186304                                | AT1G21210.1 | wall associated kinase 4 (WAK4)                                   | 0.51   | -0.98  | 0.16   | -2.68  | 0.00   | -14.31 | 0.00   | -10.96 |
| MDP0000183195                                | AT1G16120.1 | wall associated kinase-like 1 (WAKL1)                             | 7.80   | 2.96   | 1.18   | 0.24   | 5.14   | 2.36   | 3.81   | 1.93   |
| MDP0000635733                                | AT4G33270.1 | Transducin family protein / WD-40 repeat family protein (CDC20.1) | 3.31   | 1.73   | 6.82   | 2.77   | 7.48   | 2.90   | 4.77   | 2.25   |
| MDP0000194231                                | AT4G33270.1 | Transducin family protein / WD-40 repeat family protein (CDC20.1) | 2.14   | 1.10   | 7.35   | 2.88   | 8.41   | 3.07   | 3.49   | 1.80   |
| MDP0000154241                                | AT1G19780.1 | cyclic nucleotide gated channel 8 (CNGC8)                         | 35.33  | 5.14   | 73.52  | 6.20   | 28.64  | 4.84   | 8.02   | 3.00   |
| MDP0000119010                                | AT3G55270.1 | mitogen-activated protein kinase phosphatase 1 (MKP1)             | 5.57   | 2.48   | 9.99   | 3.32   | 5.63   | 2.49   | 4.65   | 2.22   |
| MDP0000305934                                | AT1G47960.1 | cell wall / vacuolar inhibitor of fructosidase 1 (C/VIF1)         | 14.77  | 3.88   | 33.10  | 5.05   | 17.42  | 4.12   | 44.54  | 5.48   |
| <b>Adventitious root development related</b> |             |                                                                   |        |        |        |        |        |        |        |        |
| MDP0000147890                                | AT5G66350.1 | Lateral root primordium (LRP) protein-related (SHI)               | 0.20   | -2.35  | 1.81   | 0.86   | 4.19   | 2.07   | 2.96   | 1.57   |
| MDP0000154312                                | AT4G38390.1 | root hair specific 17 (RHS17)                                     | 0.29   | -1.80  | 0.03   | -5.31  | 0.13   | -2.93  | 0.00   | -15.57 |
| MDP0000171430                                | AT5G12330.4 | Lateral root primordium (LRP) protein-related (LRP1)              | 3.34   | 1.74   | 20.55  | 4.36   | 30.95  | 4.95   | 42.61  | 5.41   |
| MDP0000203826                                | AT3G54220.1 | GRAS family transcription factor (SCR,SGR1)                       | 0.56   | -0.84  | 3.41   | 1.77   | 4.93   | 2.30   | 3.81   | 1.93   |
| MDP0000204381                                | AT2G47750.1 | putative indole-3-acetic acid-amido synthetase GH3.9 (GH3.9)      | 0.64   | -0.65  | 0.11   | -3.20  | 0.33   | -1.61  | 0.35   | -1.53  |
| MDP0000226842                                | AT1G28130.1 | Auxin-responsive GH3 family protein (GH3.17)                      | 0.04   | -4.51  | 0.17   | -2.60  | 2.05   | 1.03   | 0.57   | -0.82  |
| MDP0000313476                                | AT1G78080.1 | related to AP2.4 (RAP2.4)                                         | 91.68  | 6.52   | 148.33 | 7.21   | 317.96 | 8.31   | 173.44 | 7.44   |
| MDP0000397638                                | AT3G54220.1 | GRAS family transcription factor (SCR,SGR1)                       | 3.69   | 1.88   | 2.51   | 1.33   | 7.98   | 3.00   | 6.51   | 2.70   |
| MDP0000401140                                | AT1G78080.1 | related to AP2.4 (RAP2.4)                                         | 162.41 | 7.34   | 163.32 | 7.35   | 332.19 | 8.38   | 188.96 | 7.56   |
| MDP0000480281                                | AT4G15800.1 | ralf-like 33 (RALFL33)                                            | 0.46   | -1.12  | 2.12   | 1.08   | 3.78   | 1.92   | 3.70   | 1.89   |
| MDP0000593523                                | AT4G05390.1 | root FNR 1 (RFNR1)                                                | 15.60  | 3.96   | 14.01  | 3.81   | 29.98  | 4.91   | 39.19  | 5.29   |
| MDP0000635733                                | AT4G33270.1 | Transducin family protein / WD-40 repeat                          | 3.31   | 1.73   | 6.82   | 2.77   | 7.48   | 2.90   | 4.77   | 2.25   |

|               |             |                                                      |        |       |        |       |        |       |        |       |
|---------------|-------------|------------------------------------------------------|--------|-------|--------|-------|--------|-------|--------|-------|
|               |             | family protein (CDC20.1)                             |        |       |        |       |        |       |        |       |
| MDP0000719154 | AT1G71040.1 | Cupredoxin superfamily protein (LPR2)                | 3.60   | 1.85  | 1.22   | 0.28  | 0.53   | -0.92 | 0.59   | -0.77 |
| MDP0000934357 | AT5G17520.1 | root cap 1 (RCP1)                                    | 0.81   | -0.31 | 0.49   | -1.03 | 1.18   | 0.24  | 1.26   | 0.33  |
| MDP0000488361 | AT5G67400.1 | root hair specific 19 (RHS19)                        | 149.41 | 7.22  | 223.97 | 7.81  | 443.86 | 8.79  | 749.03 | 9.55  |
| MDP0000147890 | AT5G66350.1 | Lateral root primordium (LRP) protein-related (SHI)  | 0.20   | -2.35 | 1.81   | 0.86  | 4.19   | 2.07  | 2.96   | 1.57  |
| MDP0000132549 | AT4G15800.1 | ralf-like 33 (RALFL33)                               | 25.18  | 4.65  | 45.01  | 5.49  | 48.00  | 5.58  | 62.23  | 5.96  |
| MDP0000171430 | AT5G12330.4 | Lateral root primordium (LRP) protein-related (LRP1) | 3.34   | 1.74  | 20.55  | 4.36  | 30.95  | 4.95  | 42.61  | 5.41  |
| MDP0000147890 | AT5G66350.1 | Lateral root primordium (LRP) protein-related (SHI)  | 0.20   | -2.35 | 1.81   | 0.86  | 4.19   | 2.07  | 2.96   | 1.57  |
| MDP0000480281 | AT4G15800.1 | ralf-like 33 (RALFL33)                               | 0.46   | -1.12 | 2.12   | 1.08  | 3.78   | 1.92  | 3.70   | 1.89  |
| MDP0000267637 | AT4G15800.1 | ralf-like 33 (RALFL33)                               | 1.02   | 0.03  | 8.47   | 3.08  | 7.01   | 2.81  | 3.86   | 1.95  |

**Table S6.** Cytokinin-, ethylene-, brassinolide-, jasmonic acid-, abscisic acid-, and wound induction-related genes selected from among the differentially expressed genes in stem cuttings of ‘T337’ apple rootstocks during the formation of adventitious roots. The colors in every other column indicate different gene expression levels.

| Apple genes             | Arabidopsis |                                                                   | S1     |        | S2     |        | S3     |        | S4      |        |
|-------------------------|-------------|-------------------------------------------------------------------|--------|--------|--------|--------|--------|--------|---------|--------|
| Identification          | Homolog     | Annotation                                                        | Log2   |        | Log2   |        | Log2   |        | Log2    |        |
|                         |             |                                                                   | FPKM   | (FPKM) | FPKM   | (FPKM) | FPKM   | (FPKM) | FPKM    | (FPKM) |
| <b>CK related</b>       |             |                                                                   |        |        |        |        |        |        |         |        |
| MDP0000308379           | AT4G27950.1 | cytokinin response factor 4 (CRF4)                                | 4.98   | 2.32   | 5.52   | 2.47   | 10.59  | 3.40   | 8.85    | 3.15   |
| MDP0000238100           | AT5G21482.1 | cytokinin oxidase 7 (CKX7)                                        | 20.53  | 4.36   | 9.84   | 3.30   | 10.03  | 3.33   | 11.70   | 3.55   |
| MDP0000223673           | AT2G41510.1 | cytokinin oxidase/dehydrogenase 1 (AT2G41510)(CKX)                | 1.24   | 0.31   | 0.22   | -2.21  | 0.39   | -1.37  | 0.07    | -3.82  |
| MDP0000276711           | AT2G17820.1 | histidine kinase 1 (AHK1)                                         | 11.43  | 3.51   | 6.81   | 2.77   | 2.95   | 1.56   | 0.71    | -0.49  |
| MDP0000190038           | AT4G26150.1 | cytokinin-responsive gata factor 1 (GATA22/GATA1)                 | 6.09   | 2.61   | 3.05   | 1.61   | 1.42   | 0.50   | 0.77    | -0.38  |
| MDP0000013380           | AT3G63110.1 | isopenentenyltransferase 3 (IPT3)                                 | 10.45  | 3.39   | 3.85   | 1.94   | 1.97   | 0.98   | 0.46    | -1.11  |
| MDP0000220668           | AT5G19040.1 | isopenentenyltransferase 5 (IPT5)                                 | 0.31   | -1.68  | 0.16   | -2.61  | 2.20   | 1.14   | 3.18    | 1.67   |
| MDP0000189484           | AT1G68460.1 | isopenentenyltransferase 1 (IPT1-2)                               | 0.16   | -2.61  | 0.28   | -1.81  | 1.47   | 0.55   | 3.33    | 1.74   |
| MDP0000286203           | AT1G68460.1 | isopenentenyltransferase 1 (IPT1)                                 | 0.41   | -1.28  | 0.35   | -1.52  | 2.45   | 1.29   | 1.15    | 0.21   |
| MDP0000172464           | AT5G66320.1 | GATA transcription factor 5 (GATA5)                               | 13.17  | 3.72   | 9.48   | 3.24   | 5.97   | 2.58   | 3.15    | 1.66   |
| MDP0000220668           | AT5G19040.1 | isopenentenyltransferase 5 (IPT5)                                 | 0.31   | -1.68  | 0.16   | -2.61  | 2.20   | 1.14   | 3.18    | 1.67   |
| <b>Ethylene related</b> |             |                                                                   |        |        |        |        |        |        |         |        |
| MDP0000787281           | AT4G17500.1 | ethylene responsive element binding factor 1 (ERF-1)              | 82.31  | 6.36   | 38.32  | 5.26   | 41.33  | 5.37   | 55.35   | 5.79   |
| MDP0000517257           | AT4G17500.1 | ethylene responsive element binding factor 1 (ERF-1)              | 33.00  | 5.04   | 33.30  | 5.06   | 41.85  | 5.39   | 65.20   | 6.03   |
| MDP0000226115           | AT4G17500.1 | ethylene responsive element binding factor 1 (ERF-1)              | 10.87  | 3.44   | 4.55   | 2.19   | 1.80   | 0.85   | 4.00    | 2.00   |
| MDP0000791464           | AT5G47230.1 | ethylene responsive element binding factor 5 (ERF5)               | 66.60  | 6.06   | 67.54  | 6.08   | 134.61 | 7.07   | 112.16  | 6.81   |
| MDP0000189033           | AT2G44840.1 | ethylene-responsive element binding factor 13 (ERF13)             | 0.01   | -6.64  | 0.06   | -3.96  | 9.41   | 3.23   | 5.15    | 2.37   |
| MDP0000178398           | AT2G44840.1 | ethylene-responsive element binding factor 13 (ERF13)             | 0.01   | -6.64  | 0.00   |        | 0.13   | -2.91  | 1.99    | 0.99   |
| MDP0000848905           | AT3G16770.1 | ethylene-responsive element binding<br>Protein (EBP,ERF72,RAP2.3) | 176.30 | 7.46   | 137.26 | 7.10   | 179.16 | 7.49   | 333.83  | 8.38   |
| MDP0000133485           | AT2G44840.1 | ethylene-responsive element binding factor 13 (ERF13)             | 0.15   | -2.74  | 0.08   | -3.72  | 1.42   | 0.50   | 1.62    | 0.70   |
| MDP0000855671           | AT3G23240.1 | ethylene response factor 1 (ERF1)                                 | 1.43   | 0.52   | 0.28   | -1.82  | 1.27   | 0.34   | 3.77    | 1.91   |
| MDP0000235313           | AT3G23240.1 | ethylene response factor 1 (ERF1)                                 | 11.11  | 3.47   | 2.78   | 1.48   | 2.03   | 1.02   | 0.87    | -0.19  |
| MDP0000127134           | AT3G23240.1 | ethylene response factor 1 (ERF1)                                 | 26.29  | 4.72   | 11.79  | 3.56   | 7.54   | 2.91   | 5.16    | 2.37   |
| MDP0000195885           | AT1G05010.1 | ethylene-forming enzyme (EFE)                                     | 60.46  | 5.92   | 10.67  | 3.41   | 11.67  | 3.54   | 6.12    | 2.61   |
| MDP0000200737           | AT1G05010.1 | ethylene-forming enzyme (EFE2)                                    | 28.92  | 4.85   | 58.63  | 5.87   | 29.95  | 4.90   | 26.70   | 4.74   |
| MDP0000251295           | AT1G05010.1 | ethylene-forming enzyme (EFE1)                                    | 65.13  | 6.03   | 25.32  | 4.66   | 7.95   | 2.99   | 3.95    | 1.98   |
| MDP0000200896           | AT2G19590.1 | ACC oxidase 1 (ACO1)                                              | 32.61  | 5.03   | 92.73  | 6.54   | 131.73 | 7.04   | 265.95  | 8.06   |
| <b>GA related</b>       |             |                                                                   |        |        |        |        |        |        |         |        |
| MDP0000161181           | AT1G02400.1 | gibberellin 2-oxidase 6 (GA2OX4)                                  | 1.90   | 0.92   | 10.94  | 3.45   | 12.91  | 3.69   | 20.00   | 4.32   |
| MDP0000269990           | AT4G21200.1 | gibberellin 2-oxidase 8 (GA2OX8)                                  | 2.72   | 1.44   | 0.62   | -0.69  | 0.27   | -1.86  | 0.10    | -3.39  |
| MDP0000161181           | AT1G02400.1 | gibberellin 2-oxidase 6 (GA2OX6)                                  | 1.90   | 0.92   | 10.94  | 3.45   | 12.91  | 3.69   | 20.00   | 4.32   |
| MDP0000145827           | AT1G30040.1 | gibberellin 2-oxidase (GA2OX2)                                    | 16.94  | 4.08   | 6.29   | 2.65   | 3.75   | 1.91   | 0.46    | -1.14  |
| MDP0000247490           | AT1G30040.1 | gibberellin 2-oxidase (GA2OX2-2)                                  | 2.36   | 1.24   | 1.47   | 0.56   | 0.68   | -0.56  | 1.05    | 0.07   |
| MDP0000381531           | AT1G15550.1 | gibberellin 3-oxidase 1 (GA3OX1)                                  | 1.09   | 0.12   | 0.36   | -1.49  | 1.76   | 0.81   | 2.26    | 1.18   |
| MDP0000735747           | AT1G02400.1 | gibberellin 2-oxidase 6 (GA2OX6)                                  | 3.62   | 1.85   | 10.70  | 3.42   | 5.94   | 2.57   | 4.43    | 2.15   |
| MDP0000185333           | AT1G78440.1 | Arabidopsis thaliana gibberellin 2-oxidase 1 (GA2OX1-1)           | 5.20   | 2.38   | 0.69   | -0.53  | 4.35   | 2.12   | 3.01    | 1.59   |
| MDP0000137705           | AT1G78440.1 | Arabidopsis thaliana gibberellin 2-oxidase 1 (GA2OX1)             | 42.86  | 5.42   | 13.58  | 3.76   | 24.91  | 4.64   | 45.41   | 5.51   |
| MDP0000212045           | AT1G74670.1 | Gibberellin-regulated family protein (AT1G74670)                  | 70.82  | 6.15   | 341.15 | 8.41   | 429.61 | 8.75   | 1207.91 | 10.24  |
| MDP0000126347           | AT1G74670.1 | Gibberellin-regulated family protein (AT1G74670)                  | 0.01   | -6.64  | 0.16   | -2.63  | 5.31   | 2.41   | 3.74    | 1.90   |
| MDP0000366256           | AT5G59845.1 | Gibberellin-regulated family protein (AT5G59845)                  | 1.56   | 0.64   | 0.76   | -0.40  | 0.74   | -0.43  | 0.12    | -3.07  |

|                                       |             |                                                      |        |       |        |       |        |       |        |        |
|---------------------------------------|-------------|------------------------------------------------------|--------|-------|--------|-------|--------|-------|--------|--------|
| MDP0000150771                         | AT5G59845.1 | Gibberellin-regulated family protein (AT5G59845)     | 0.32   | -1.62 | 0.01   | -6.64 | 1.24   | 0.32  | 0.01   | -6.64  |
| MDP0000269551                         | AT5G14920.1 | Gibberellin-regulated family protein (AT5G14920)     | 57.32  | 5.84  | 24.93  | 4.64  | 18.73  | 4.23  | 8.71   | 3.12   |
| MDP0000901967                         | AT5G14920.1 | Gibberellin-regulated family protein (AT5G14920)     | 14.07  | 3.82  | 44.03  | 5.46  | 333.97 | 8.38  | 666.28 | 9.38   |
| <b>JA related</b>                     |             |                                                      |        |       |        |       |        |       |        |        |
| MDP0000301927                         | AT5G20900.1 | jasmonate-zim-domain protein 12 (JAZ12)              | 51.81  | 5.70  | 20.08  | 4.33  | 46.52  | 5.54  | 33.55  | 5.07   |
| MDP0000565690                         | AT1G72450.1 | jasmonate-zim-domain protein 6 (JAZ26)               | 61.79  | 5.95  | 51.17  | 5.68  | 81.70  | 6.35  | 92.02  | 6.52   |
| MDP0000901967                         | AT5G14920.1 | jasmonate-zim-domain protein 12 (JAZ12)              | 14.07  | 3.82  | 44.03  | 5.46  | 333.97 | 8.38  | 666.28 | 9.38   |
| MDP0000173535                         | AT2G34600.1 | jasmonate-zim-domain protein 7 (JAZ7)                | 0.01   | -6.64 | 0.01   | -6.64 | 0.01   | -6.64 | 1.97   | 0.98   |
| <b>ABA related</b>                    |             |                                                      |        |       |        |       |        |       |        |        |
| MDP0000120164                         | AT5G53160.2 | regulatory components of ABA receptor 3 (PYL8,RCAR3) | 10.01  | 3.32  | 8.87   | 3.15  | 4.72   | 2.24  | 4.82   | 2.27   |
| <b>BR related</b>                     |             |                                                      |        |       |        |       |        |       |        |        |
| MDP0000151563                         | AT4G35230.1 | BR-signaling kinase 1 (BSK1)                         | 0.49   | -1.04 | 0.12   | -3.04 | 0.50   | -1.00 | 0.00   | -18.47 |
| MDP0000286141                         | AT3G30180.1 | brassinosteroid-6-oxidase 2 (BR6OX2)                 | 0.50   | -0.99 | 1.33   | 0.42  | 5.02   | 2.33  | 6.46   | 2.69   |
| <b>Wd-Id related</b>                  |             |                                                      |        |       |        |       |        |       |        |        |
| MDP0000275128                         | AT4G10270.1 | Wound-responsive family protein (Wd-Id-1)            | 15.93  | 3.99  | 7.58   | 2.92  | 10.77  | 3.43  | 199.14 | 7.64   |
| MDP0000794258                         | AT4G10265.1 | Wound-responsive family protein (Wd-Id-2)            | 126.24 | 6.98  | 51.78  | 5.69  | 59.57  | 5.90  | 561.86 | 9.13   |
| MDP0000732626                         | AT3G07230.1 | wound-responsive protein-related (Wd-Id-3)           | 32.18  | 5.01  | 101.46 | 6.66  | 272.62 | 8.09  | 195.73 | 7.61   |
| MDP0000836784                         | AT4G10265.1 | Wound-responsive family protein (Wd-Id-4)            | 32.79  | 5.04  | 20.98  | 4.39  | 47.14  | 5.56  | 296.89 | 8.21   |
| MDP0000171638                         | AT4G10270.1 | Wound-responsive family protein (Wd-Id-5)            | 1.38   | 0.46  | 0.62   | -0.68 | 1.44   | 0.52  | 77.88  | 6.28   |
| MDP0000836785                         | AT4G10265.1 | Wound-responsive family protein (Wd-Id-6)            | 0.77   | -0.38 | 0.96   | -0.06 | 3.23   | 1.69  | 17.76  | 4.15   |
| MDP0000564079                         | AT4G10265.1 | Wound-responsive family protein (Wd-Id-7)            | 9.83   | 3.30  | 5.54   | 2.47  | 10.90  | 3.45  | 198.30 | 7.63   |
| MDP0000228919                         | AT4G28240.1 | Wound-responsive family protein (Wd-Id-8)            | 47.13  | 5.56  | 27.49  | 4.78  | 16.86  | 4.08  | 6.54   | 2.71   |
| <b>Pyruvic acid analogues related</b> |             |                                                      |        |       |        |       |        |       |        |        |
| MDP0000228470                         | AT2G38310.1 | PYR1-like 4 (PYL4)                                   | 43.97  | 5.46  | 32.00  | 5.00  | 52.33  | 5.71  | 81.55  | 6.35   |
| MDP0000270731                         | AT2G38310.1 | PYR1-like 4 (PYL4)                                   | 17.06  | 4.09  | 13.06  | 3.71  | 33.75  | 5.08  | 29.83  | 4.90   |
| MDP0000147358                         | AT2G26040.1 | PYR1-like 2 (PYL2)                                   | 0.67   | -0.57 | 0.24   | -2.06 | 5.39   | 2.43  | 10.91  | 3.45   |
| MDP0000437033                         | AT4G26080.1 | Protein phosphatase 2C family protein (ABI1)         | 23.67  | 4.56  | 25.21  | 4.66  | 27.98  | 4.81  | 11.79  | 3.56   |

**Table S7.** Sugar-related genes selected from among the differentially expressed genes in stem cuttings of ‘T337’ apple rootstocks during the formation of adventitious roots. The colors in every other column indicate different gene expression levels.

| Apple genes                                               | Arabidopsis |                                                      | S1    |        | S2     |        | S3    |        | S4    |        |
|-----------------------------------------------------------|-------------|------------------------------------------------------|-------|--------|--------|--------|-------|--------|-------|--------|
| Identification                                            | Homolog     | Annotation                                           | Log2  |        | Log2   |        | Log2  |        | Log2  |        |
|                                                           |             |                                                      | FPKM  | (FPKM) | FPKM   | (FPKM) | FPKM  | (FPKM) | FPKM  | (FPKM) |
| <b>Sucrose/Pectin biosynthesis and metabolism process</b> |             |                                                      |       |        |        |        |       |        |       |        |
| MDP0000227289                                             | AT4G20050.1 | Pectin lyase-like superfamily protein (QRT3)         | 3.13  | 1.65   | 1.13   | 0.18   | 1.40  | 0.49   | 0.45  | -1.17  |
| MDP0000250070                                             | AT3G43190.1 | sucrose synthase 4 (SUS4-3)                          | 38.31 | 5.26   | 108.78 | 6.77   | 65.62 | 6.04   | 70.98 | 6.15   |
| MDP0000872262                                             | AT3G43190.1 | sucrose synthase 4 (SUS4)                            | 0.44  | -1.18  | 1.11   | 0.15   | 5.53  | 2.47   | 6.32  | 2.66   |
| MDP0000288684                                             | AT4G10120.1 | Sucrose-phosphate synthase family protein (ATSPS4F)  | 8.26  | 3.05   | 6.19   | 2.63   | 2.38  | 1.25   | 1.53  | 0.62   |
| MDP0000132527                                             | AT3G43190.1 | sucrose synthase 4 (SUS4)                            | 1.03  | 0.05   | 1.32   | 0.40   | 4.22  | 2.08   | 4.23  | 2.08   |
| <b>Cellulose biosynthesis and metabolism process</b>      |             |                                                      |       |        |        |        |       |        |       |        |
| MDP0000185368                                             | AT2G21770.1 | cellulose synthase A9 (CESA9)                        | 9.43  | 3.24   | 9.46   | 3.24   | 16.59 | 4.05   | 27.99 | 4.81   |
| MDP0000792906                                             | AT2G21770.1 | cellulose synthase A9 (CESA9)                        | 4.30  | 2.10   | 5.73   | 2.52   | 8.48  | 3.08   | 9.59  | 3.26   |
| MDP0000572242                                             | AT4G07960.1 | Cellulose-synthase-like C12 (CSLC12)                 | 11.21 | 3.49   | 13.15  | 3.72   | 21.05 | 4.40   | 34.85 | 5.12   |
| MDP0000553959                                             | AT4G32410.1 | cellulose synthase 1 (CESA1,RSW1)                    | 21.41 | 4.42   | 24.54  | 4.62   | 37.51 | 5.23   | 53.74 | 5.75   |
| MDP0000480237                                             | AT5G64740.1 | cellulose synthase 6 (CESA6,E112,IXR2,PRC1)          | 4.49  | 2.17   | 4.53   | 2.18   | 6.03  | 2.59   | 10.74 | 3.42   |
| MDP0000128267                                             | AT4G32410.1 | cellulose synthase 1 (CESA1,RSW1)                    | 30.88 | 4.95   | 33.91  | 5.08   | 51.55 | 5.69   | 69.63 | 6.12   |
| MDP0000470441                                             | AT5G17420.1 | Cellulose synthase family protein (CESA7,IRX3,MUR10) | 0.00  | -13.02 | 0.03   | -5.06  | 0.54  | -0.89  | 0.04  | -4.77  |
| MDP0000448752                                             | AT5G05170.1 | Cellulose synthase family protein (CESA7,IRX3,MUR10) | 45.16 | 5.50   | 50.19  | 5.65   | 55.36 | 5.79   | 79.61 | 6.31   |
| MDP0000263736                                             | AT5G22740.1 | cellulose synthase-like A02 (CSLA02,CSLA2)           | 16.88 | 4.08   | 46.99  | 5.55   | 45.69 | 5.51   | 78.64 | 6.30   |
| MDP0000183140                                             | AT3G28180.1 | Cellulose-synthase-like C4 (CSLC04,CSLC4)            | 1.79  | 0.84   | 3.61   | 1.85   | 6.13  | 2.62   | 15.34 | 3.94   |
| <b>other</b>                                              |             |                                                      |       |        |        |        |       |        |       |        |
| MDP0000181206                                             | AT2G19860.1 | hexokinase 2 (HXK2)                                  | 24.27 | 4.60   | 15.69  | 3.97   | 24.11 | 4.59   | 24.50 | 4.61   |
| MDP0000940086                                             | AT3G18830.1 | polyol/monosaccharide transporter 5 (PMT5)           | 39.10 | 5.29   | 39.42  | 5.30   | 22.08 | 4.46   | 10.28 | 3.36   |
| MDP0000755167                                             | AT3G18830.1 | polyol/monosaccharide transporter 5 (PMT5)           | 95.09 | 6.57   | 59.49  | 5.89   | 48.05 | 5.59   | 35.41 | 5.15   |
| MDP0000175450                                             | AT3G18830.1 | polyol/monosaccharide transporter 5 (PMT5)           | 1.94  | 0.96   | 1.08   | 0.11   | 6.25  | 2.64   | 7.52  | 2.91   |
| MDP0000688348                                             | AT3G18830.1 | polyol/monosaccharide transporter 5(PMT5)            | 38.73 | 5.28   | 19.54  | 4.29   | 7.00  | 2.81   | 1.79  | 0.84   |

**Table S8.** Enzyme-related genes selected from among the differentially expressed genes in stem cuttings of ‘T337’ apple rootstock during the formation of adventitious roots. The colors in every other column indicate different gene expression levels.

| Apple genes                      | Arabidopsis |                                                        | S1    |        | S2    |        | S3    |        | S4    |        |
|----------------------------------|-------------|--------------------------------------------------------|-------|--------|-------|--------|-------|--------|-------|--------|
| Identification                   | Homolog     | Annotation                                             | Log2  |        | Log2  |        | Log2  |        | Log2  |        |
|                                  |             |                                                        | FPKM  | (FPKM) | FPKM  | (FPKM) | FPKM  | (FPKM) | FPKM  | (FPKM) |
| <b>Biological enzyme related</b> |             |                                                        |       |        |       |        |       |        |       |        |
| MDP0000602139                    | AT4G01250.1 | WRKY family transcription factor (WRKY)                | 2.48  | 1.31   | 0.49  | -1.03  | 2.26  | 1.17   | 2.21  | 1.14   |
| MDP0000294667                    | AT5G08640.1 | flavonol synthase 1 (FLS1)                             | 3.84  | 1.94   | 0.84  | -0.25  | 1.54  | 0.63   | 0.00  | -21.03 |
| MDP0000302980                    | AT3G17390.1 | S-adenosylmethionine synthetase family protein (SAMS3) | 33.20 | 5.05   | 36.95 | 5.21   | 32.94 | 5.04   | 22.01 | 4.46   |
| MDP0000277049                    | AT2G22780.1 | peroxisomal NAD-malate dehydrogenase 1 (PMDH1)         | 3.24  | 1.69   | 0.56  | -0.85  | 0.96  | -0.05  | 0.23  | -2.14  |
| MDP0000602139                    | AT4G01250.1 | WRKY family transcription factor (WRKY22)              | 2.48  | 1.31   | 0.49  | -1.03  | 2.26  | 1.17   | 2.21  | 1.14   |
